# Supplementary material
Source: PubMed Central journal article supplement (PMC4325987)
Supplement: NIHMS626324-supplement-2.pdf [file NIHMS626324-supplement-2.pdf]

**Supplemental Figure 1, related to Figure 1.**

**Expression and properties of GIRK1<sup>+/2</sup> MSNs**

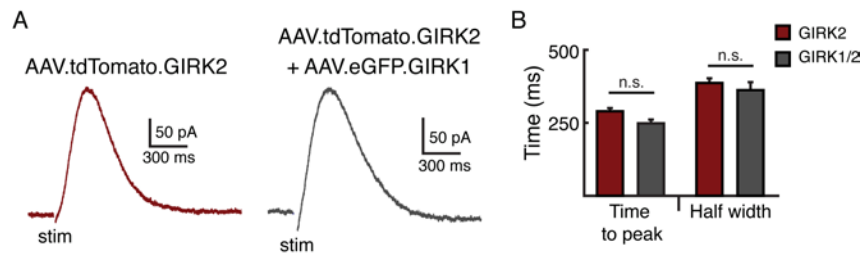

(A) Representative traces of D2-IPSCs recorded from an animal injected with AAV.tdTomato.GIRK2 alone (left) or an animal injected with both AAV.tdTomato.GIRK2 and AAV.eGFP.GIRK1 (right). No significant difference in kinetics (time to peak:  $p = 0.06$ ; half width:  $p = 0.4$ ) was observed between D2-IPSCs from animals injected with GIRK2 ( $n = 21$ ) and D2-IPSCs from animals injected with GIRK1/2 ( $n = 7$ ). (B) Summary data

**Supplemental Figure 2, related to Figure 2.**  
**Properties of MSN D2-IPSCs.**

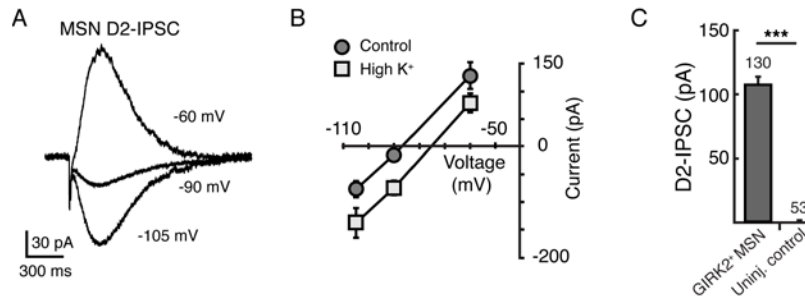

(A) Representative whole cell recording of D2-IPSCs evoked at a holding potential of -60 mV, -90 mV, and -105 mV, illustrating that the D2-IPSC reverses near the predicted potassium reversal potential ( $E_{rev} = -88$  mV,  $n = 6$ ). (B) Current-voltage relationship of the D2-IPSC under control conditions (2.5 mM extracellular K<sup>+</sup>, gray circles) and in high extracellular K<sup>+</sup> (5 mM extracellular K<sup>+</sup>, open squares) demonstrating the expected right shift of the current-voltage plot ( $E_{rev} = -76$  mV,  $n = 6$ ). (C) Summary data illustrating a lack of D2-IPSCs following electrical stimulation of uninjected control MSNs (control uninjected:  $n = 53$ ; GIRK2<sup>+</sup>  $n = 130$ ,  $p < 0.001$ ).

## Supplemental Figure 3, related to Figure 3.

### Excitability of MSNs and expression of ChR2 in dopamine neurons

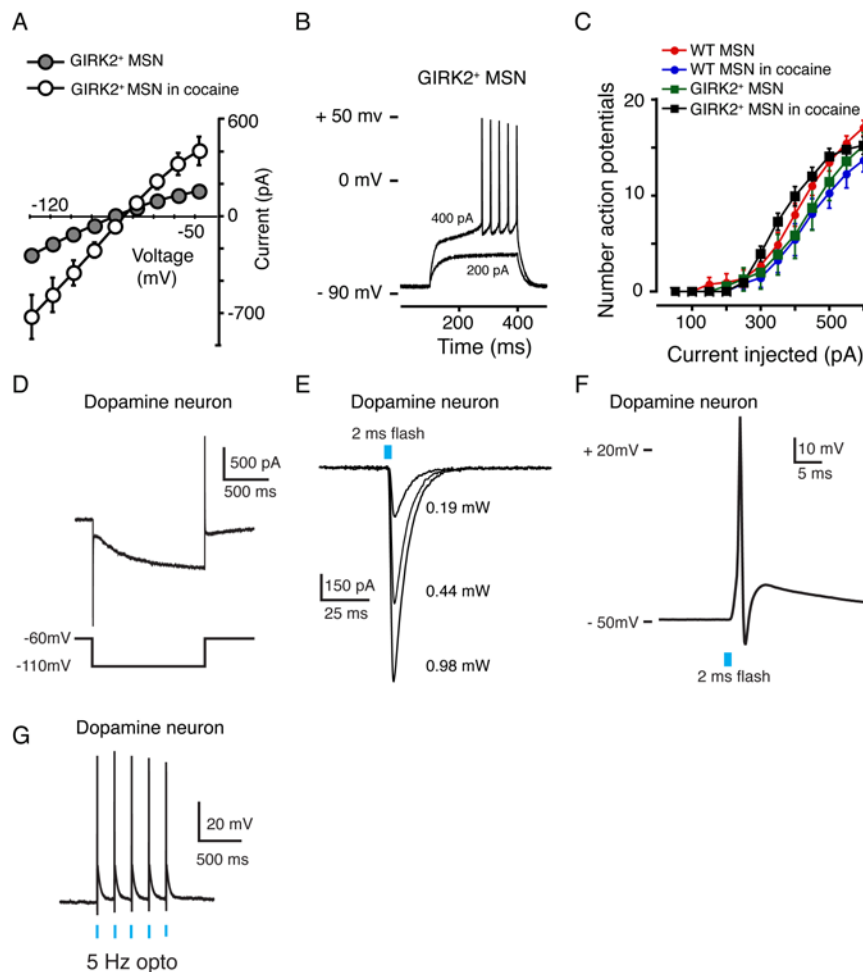

(A) Dopamine-evoked current-voltage relationship. 10 mV voltage steps were given from -50 mV to -130 mV (as in Figure 1G). Dopamine was applied to GIRK2<sup>+</sup> MSNs in the presence and absence of cocaine (3  $\mu$ M). (B) Current clamp recording illustrating the excitability of GIRK2<sup>+</sup> MSN. (C) Expression of GIRK2<sup>+</sup> and the presence of cocaine (3  $\mu$ M) does not alter the excitability of MSNs. (D) Dopamine neurons in the SNc and VTA were identified by the existence of an h-current. (E) Example voltage clamp recording from a dopamine neuron showing that a 2 ms flash of blue light produced an inward current that was dependent on the power of light used. (F) Example current-clamp

recording from a dopamine neuron showing light evoked an action potential (flash, 2 ms). **(G)** Example current-clamp recording from a dopamine neuron showing a train of light evoked action potentials by a train of stimulation (5 Hz, 2 ms pulse). Action potentials from SNc dopamine neurons were recorded in current-clamp mode in horizontal slices (220  $\mu\text{m}$ ) containing 200 nM S-(-)-sulpiride to prevent autoreceptor-mediated inhibition of firing.
